# Supplementary material
Source: ML conference proceedings conference paper supplement (https://openaccess.thecvf.com/content/WACV2024/html/Singh_Learning_Robust_Deep_WACV_2024_paper.html)
Supplement: Supplementary file 1 [file Singh_Learning_Robust_Deep_WACV_2024_supplemental.pdf]

# Supplementary: Learning Robust Deep Visual Representations from EEG Brain Recordings

Prajwal Singh<sup>†\*</sup>, Dwip Dalal<sup>†</sup>, Gautam Vashishtha<sup>†</sup>, Krishna Miyapuram<sup>‡</sup>, Shanmuganathan Raman<sup>†\*</sup>  
CVIG Lab<sup>†</sup>, BRAIN Lab<sup>‡</sup>  
IIT Gandhinagar, India

{singh\_prajwal, dwip.dalal, gautam.pv, kprasad, shanmuga}@iitgn.ac.in

## References

- [1] Pradeep Kumar, Rajkumar Saini, Partha Pratim Roy, Pawan Kumar Sahu, and Debi Prosad Dogra. Envisioned speech recognition using eeg sensors. *Personal and Ubiquitous Computing*, 22:185–199, 2018.
- [2] Concetto Spampinato, Simone Palazzo, Isaak Kavasidis, Daniela Giordano, Nasim Souly, and Mubarak Shah. Deep learning human mind for automated visual classification. *2017 IEEE Conference on Computer Vision and Pattern Recognition (CVPR)*, pages 4503–4511, 2016.
- [3] Praveen Tirupattur, Yogesh Singh Rawat, Concetto Spampinato, and Mubarak Shah. Thoughtviz: Visualizing human thoughts using generative adversarial network. In *Proceedings of the 26th ACM international conference on Multimedia*, pages 950–958, 2018.

---

\*This work is supported by Prime Minister Research Fellowship (PMRF-2122-2557) and and Jibaben Patel Chair in Artificial Intelligence.

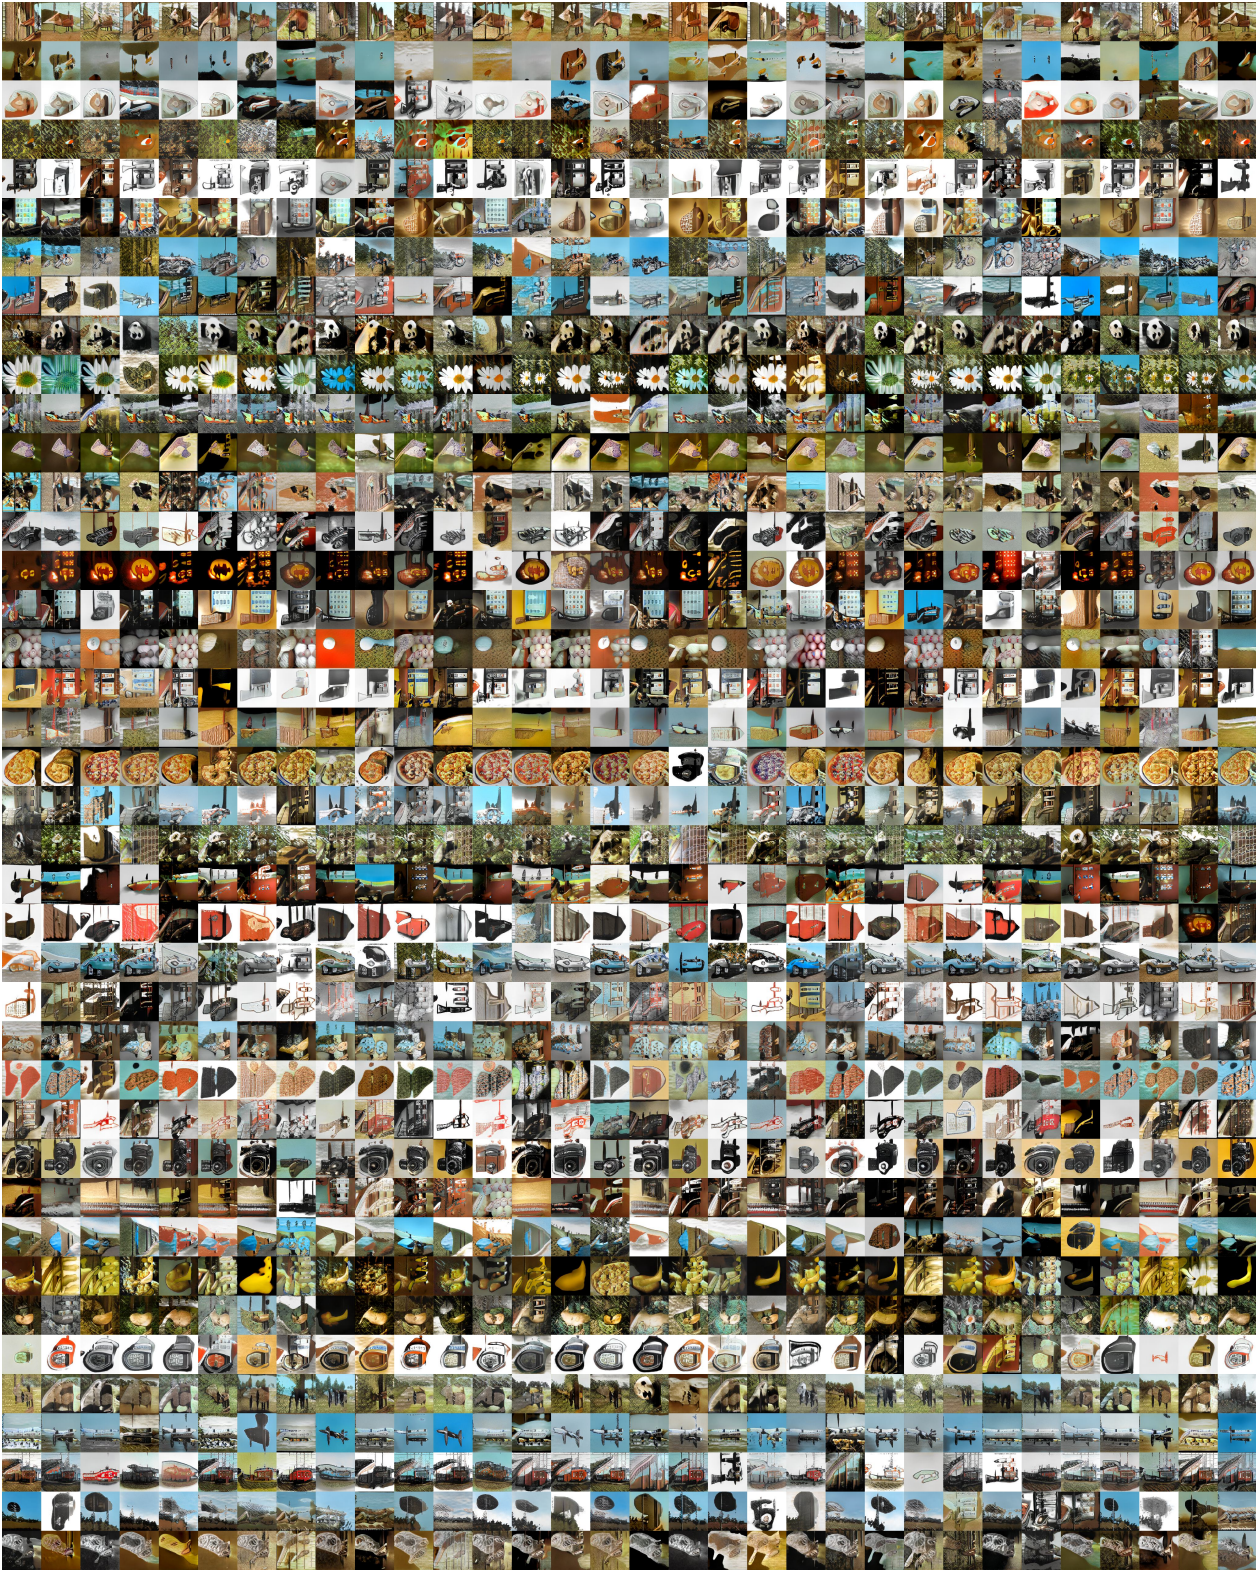

Figure 1: **EEG to Image.** Images generated from EEGStyleGAN-ADA using EEG signals for all 40 classes that show diversity and fidelity, where each image is generated with different EEG signals across different classes, EEGCVPR40 dataset [2].

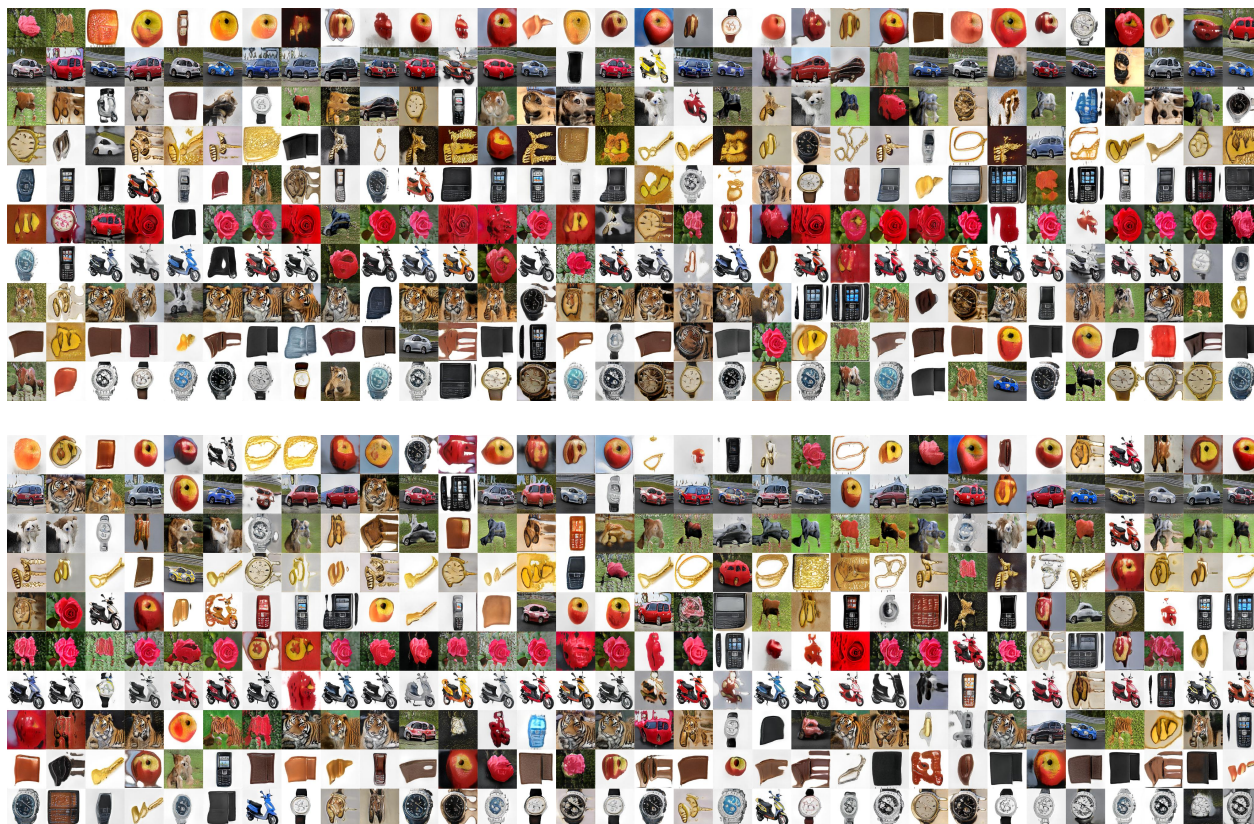

Figure 2: **EEG to Image.** Sample images generated (top and bottom row) from EEGStyleGAN-ADA using EEG signals where each image is generated with different EEG signals across different classes, ThoughtViz dataset [1, 3]. There is some overlapping between classes of generated samples due to the overlapping representation learned from a small EEG dataset, which is illustrated in the main paper.
